# Supplementary material for: Integration of an invasive consumer into an estuarine food web: direct and indirect effects of the New Zealand mud snail
Source: PubMed Central journal article supplement — Oecologia. 2011 Mar 30;167(1):169–79. doi: 10.1007/s00442-011-1962-8 (PMC3155678; doi:10.1007/s00442-011-1962-8), 2011-03-30
Supplement: 442_2011_1962_MOESM1_ESM.pdf [file 442_2011_1962_MOESM1_ESM.pdf]

Electronic Supplementary Materials for *Oecologia*

**Integration of an invasive consumer into an estuarine food web: Direct and indirect effects of the New Zealand mud snail**

Valance E. F. Brenneis<sup>\*1,2</sup>, Andrew Sih<sup>1</sup>, and Catherine E. de Rivera<sup>2</sup>

<sup>1</sup>*University of California, Davis. Department of Environmental Science & Policy  
One Shields Avenue, Davis, CA 95616*

<sup>2</sup>*Portland State University. Department of Environmental Science & Management  
P.O. Box 751, Portland, OR 97207*

\*Corresponding author - Tel: (503) 725-4982 Fax: (503) 725-9040 E-mail:

valanceb@pdx.edu

Appendix A. Field survey site information, fish catch, and benthic invertebrate densities. Values for July, August, and September 2008 sampling events within a bay are averaged.

|                                                     | <b>Youngs Bay, OR</b> | <b>Baker Bay, WA</b> |
|-----------------------------------------------------|-----------------------|----------------------|
| Latitude                                            | 46.10'16"             | 46.16'40"            |
| Longitude                                           | 123.53'00"            | 124.01'00"           |
| Temperature range                                   | 17.2 - 18.9°C         | 15.1 - 18.0°C        |
| Salinity range                                      | 3.1 - 6.4 psu         | 8.1 - 14.0 psu       |
| Conductivity                                        | 5.6 - 11.2 ms         | 14.0 - 23.1 ms       |
| <b>Total fish catch</b>                             |                       |                      |
| Pacific staghorn sculpin                            | 10                    | 10                   |
| Threespine stickleback                              | 5,172                 | 62                   |
| Shiner perch                                        | 1,997                 | 84                   |
| Starry flounder                                     | 1                     | 31                   |
| English sole                                        | 0                     | 196                  |
| <b>Benthic invertebrate density</b>                 |                       |                      |
| <i>P. antipodarum</i> (Mean # m <sup>-2</sup> ± SE) | 172.4 ± 33.7          | 1.6 ± 1.1            |
| <i>Americorophium spp.</i>                          | 3,880.1 ± 916.5       | 36.1 ± 14.4          |
| <i>Eogammarus spp.</i>                              | 8.02 ± 4.2            | 0                    |
| <i>Macoma spp.</i>                                  | 3.2 ± 1.9             | 8.0 ± 3.4            |
| <i>Polycheate spp.</i>                              | 111.4 ± 18.4          | 20.0 ± 10.6          |
| <i>Mysid spp.</i>                                   | 7.2 ± 4.1             | 7.2 ± 5.6            |
| Other gammarid amphipods                            | 0                     | 24.9 ± 12.4          |
