# Supplementary material for: Integration of an invasive consumer into an estuarine food web: direct and indirect effects of the New Zealand mud snail
Source: PubMed Central journal article supplement — Oecologia. 2011 Mar 30;167(1):169–79. doi: 10.1007/s00442-011-1962-8 (PMC3155678; doi:10.1007/s00442-011-1962-8), 2011-03-30
Supplement: 442_2011_1962_MOESM2_ESM.pdf [file 442_2011_1962_MOESM2_ESM.pdf]

Appendix B. Index of Relative Importance Values for fish caught during Summer 2008 (Maximum n = 10 per site per sampling date). Target fish included threespine stickleback (TSS), Pacific staghorn sculpin (PSS), shiner perch (SP) yearling (Y1) and young of the year (YOY), English sole (ES), and starry flounder (SF). New Zealand mudsnail (NZMS) were found in the diets of several fish. S+I refers to the content of ‘stomach plus intestines’. Invertebrates are usually identified by genus or order. ‘Eogam’ refers to the amphipod *Eogammarus confervicolus*, ‘cancer meg’ refers to cancer crab megalops (larvae), and ‘other poly’ refers to unidentified polychaetes.

| Bay          | Baker | Youngs | Baker | Youngs | Baker | Baker | Youngs | Youngs | Baker | Baker | Baker | Baker | Youngs |
|--------------|-------|--------|-------|--------|-------|-------|--------|--------|-------|-------|-------|-------|--------|
| Fish Species | TSS   | TSS    | PSS   | PSS    | Y1    | YOY   | SP Y1  | YOY    | YOY   | Y1    | YOY   | Y1    | SF     |
| With NZMS    |       |        |       |        |       |       |        |        |       |       |       |       |        |
| (S+I)        | 0     | 0      | 0     | 1      | 0     | 0     | 2      | 0      | 2     | 0     | 0     | 0     | 0      |
| Total n      | 11    | 60     | 10    | 11     | 9     | 25    | 6      | 44     | 55    | 2     | 23    | 6     | 1      |
| NZMS IRI     | 0     | 0      | 0     | 1.7    | 0     | 0     | 98.34  | 0      | 0.77  | 0     | 0     | 0     | 0      |
| %IRI NZMS    | 0     | 0      | 0     | 0.14   | 0     | 0     | 32     | 0      | 0.04  | 0     | 0     | 0     | 0      |

|                |       |         |       |       |       |       |       |         |       |     |       |       |     |
|----------------|-------|---------|-------|-------|-------|-------|-------|---------|-------|-----|-------|-------|-----|
| Americorophium |       |         |       |       |       |       |       |         |       |     |       |       |     |
| IRI            | 136.4 | 9013.75 | 158.8 | 509.6 | 0     | 213.7 | 160.7 | 10458.7 | 794.3 | 0   | 788.4 | 4.82  | 200 |
| %Americ. IRI   | 50.9  | 62      | 29.1  | 40.8  | 0     | 17.8  | 52.3  | 77.9    | 41.3  | 0   | 55.9  | 0.62  | 100 |
| Nereid IRI     | 106   | 534     | 303.6 | 0     | 187.8 | 0     | 0     | 36.08   | 579.2 | 0   | 576   | 763.2 | 0   |
| %IRI Nereid    | 39.5  | 3.7     | 55.7  | 0     | 38.1  | 0     | 0     | 0.27    | 30.1  | 0   | 40.1  | 98.8  | 0   |
| Gammarid IRI   | 25.8  | 303.5   | 0     | 22.3  | 0     | 3.04  | 0     | 24.66   | 349.7 | 200 | 4.74  | 4.39  | 0   |
| %IRI Gammarid  | 9.6   | 2.1     | 0     | 1.78  | 0     | 0.25  | 0     | 0.18    | 18.2  | 100 | 0.34  | 0.57  | 0   |
| Mysid IRI      | 0     | 2.71    | 6.34  | 0     | 0     | 0     | 0     | 0       | 191.4 | 0   | 14.6  | 0     | 0   |
| %IRI Mysid     | 0     | 0.02    | 1.16  | 0     | 0     | 0     | 0     | 0       | 9.96  | 0   | 1.03  | 0     | 0   |
| Copepod IRI    | 0     | 4673.1  | 0     | 0     | 297.9 | 798   | 48.4  | 2912.2  | 2.79  | 0   | 0     | 0     | 0   |
| %IRI Copepod   | 0     | 32.2    | 0     | 0     | 60.5  | 66.4  | 15.8  | 21.68   | 0.15  | 0   | 0     | 0     | 0   |
| Crangon IRI    | 0     | 3.36    | 76.8  | 712.7 | 0     | 0     | 0     | 0       | 0     | 0   | 0     | 0     | 0   |
| %IRI Crangon   | 0     | 0.02    | 14.1  | 57    | 0     | 0     | 0     | 0       | 0     | 0   | 0     | 0     | 0   |
| Eogam IRI      | 0     | 0       | 0     | 1.5   | 0     | 169.4 | 0     | 0       | 0     | 0   | 27    | 0     | 0   |
| %IRI Eogam     | 0     | 0       | 0     | 0.12  | 0     | 14.1  | 0     | 0       | 0     | 0   | 1.94  | 0     | 0   |
