# Supplementary material for: Integration of an invasive consumer into an estuarine food web: direct and indirect effects of the New Zealand mud snail
Source: PubMed Central journal article supplement — Oecologia. 2011 Mar 30;167(1):169–79. doi: 10.1007/s00442-011-1962-8 (PMC3155678; doi:10.1007/s00442-011-1962-8), 2011-03-30
Supplement: 442_2011_1962_MOESM3_ESM.pdf [file 442_2011_1962_MOESM3_ESM.pdf]

Appendix C. Proportion of the diet derived from plankton versus periphyton-based food webs derived from  $\delta^{13}\text{C}$  values.  $\delta^{13}\text{C}$  fractionation between trophic levels estimated at 0.4‰. Trophic step assumed to be 1 for invertebrates and 2 for fish (based on  $\delta^{15}\text{N}$  values). (Mean  $\pm$  SE)

\*Indicates a group containing fish that consumed *P. antipodarum*. BB – Baker Bay, YB – Youngs Bay, Y1 – 1 Year, YOY – Young of the year.

|                                  | Periphyton      | Plankton (> 80 $\mu\text{m}$ ) |
|----------------------------------|-----------------|--------------------------------|
| Pacific staghorn sculpin YB *    | 0.34 $\pm$ 0.08 | 0.66 $\pm$ 0.08                |
| Pacific staghorn sculpin BB      | 0.62 $\pm$ 0.1  | 0.38 $\pm$ 0.1                 |
| Shiner perch YB (Y1) *           | 0.59 $\pm$ 0.06 | 0.41 $\pm$ 0.06                |
| Shiner perch BB (Y1)             | 0.69 $\pm$ 0.07 | 0.31 $\pm$ 0.07                |
| Threespine stickleback YB        | 0.16 $\pm$ 0.05 | 0.84 $\pm$ 0.05                |
| Threespine stickleback BB        | 0.12 $\pm$ 0.05 | 0.88 $\pm$ 0.05                |
| English sole BB (YOY) *          | 0.53 $\pm$ 0.09 | 0.47 $\pm$ 0.09                |
| Starry flounder BB (YOY)         | 0.42 $\pm$ 0.12 | 0.58 $\pm$ 0.12                |
| <i>Gnorimosphaeroma insulare</i> | 0.75 $\pm$ 0.2  | 0.25 $\pm$ 0.2                 |
| <i>P. antipodarum</i> (NZMS)     | 0.73 $\pm$ 0.08 | 0.27 $\pm$ 0.08                |
| <i>Mysid spp.</i>                | 0.59 $\pm$ 0.1  | 0.41 $\pm$ 0.1                 |
| <i>Eogammarus confervicolus</i>  | 0.57 $\pm$ 0.18 | 0.43 $\pm$ 0.18                |
| <i>Crangon spp.</i>              | 0.48 $\pm$ 0.06 | 0.52 $\pm$ 0.06                |
| <i>Americorophium spp.</i>       | 0.28 $\pm$ 0.08 | 0.72 $\pm$ 0.08                |

|                    |                 |                 |
|--------------------|-----------------|-----------------|
| Nereid polychaetes | $0.19 \pm 0.07$ | $0.81 \pm 0.07$ |
| Bivalves           | $0.08 \pm 0.04$ | $0.92 \pm 0.04$ |

---
